# Supplementary material for: Carboxylated mesoporous carbon hollow spheres for the efficient solid-phase microextraction of aromatic amines
Source: Royal Society of Chemistry journal article supplement (doi:10.1039/d3an00376k), 2023-01-01
Supplement: d3an00376k1.pdf [file d3an00376k1.pdf]

## Supplementary Material

### Carboxylated mesoporous carbon hollow spheres for efficient solid-phase microextraction of aromatic amines

Shixiang Chen<sup>a</sup>, Zejun Yu<sup>a</sup>, Wenmin Zhang<sup>b</sup>, Hui Chen<sup>a</sup>, Qingqing Ding<sup>a</sup>, Jinhua Xu<sup>a</sup>,  
Qidong Yu<sup>a</sup>, Lan Zhang<sup>a,\*</sup>

<sup>a</sup> Ministry of Education Key Laboratory for Analytical Science of Food Safety and  
Biology, Fujian Province Key Laboratory of Analysis and Detection Technology for  
Food Safety, College of Chemistry, Fuzhou University, Fuzhou, Fujian, 350116, China

<sup>b</sup> Department of Chemical and Biological Technology, Minjiang Teachers College,  
Fuzhou, Fujian, 350108, China

- **Corresponding author:** Lan Zhang
  
- **Postal address:** College of Chemistry, Fuzhou University, Fuzhou, Fujian, 350116,  
China
  
- **Tel:** 86-591-22866135
  
- **Fax:** 86-591-22866135
  
- E-mail:** zlan@fzu.edu.cn (L. Zhang)

## Materials and methods

**Chemicals and reagents.** All reagents were of analytical grade. Ammonia solution ( $\text{NH}_3\cdot\text{H}_2\text{O}$ , 25wt%), hydrogen peroxide aqueous solution ( $\text{H}_2\text{O}_2$ , 30%), dichloromethane (DCM), methanol (MT), acetone (CP) and ethanol (EtOH) were bought from China Pharmaceutical Reagent Co. Ltd (Shanghai, China). Deionized water ( $18.2 \text{ M}\Omega \text{ cm}^{-1}$ ) was obtained by Milli-Q water purification system (Millipore, USA). Hydrofluoric acid (10%) was purchased from Fuchen Chemical Reagent Factory (Tianjin, China). Formaldehyde solution (37%) was purchased from Xilong Scientific Co. Ltd (Guangdong, China). Resorcinol, tetrapropyl orthosilicate (TPOS, 97%), standard solution of PCBs, naphthol, PAEs (the specific names and chemical structures was listed in Table. S1) and AAs including 2,3-dichloroaniline (2,3-DRA, 98%), 3,4-dichloroaniline (3,4-DRA, 98%), 1-naphthylamine (1-NA, 99%), 2-naphthylamine (2-NA, 99%) and 4-aminobipheny (4-ABP, 99%) were purchased from Aladdin Chemistry Co. Ltd. (Shanghai, China). All the AAs were formulated in acetone to obtained stock solutions ( $1000.0 \text{ ng mL}^{-1}$ ). Various concentrations of AAs solutions were prepared by stepwise diluting of the stock solution with water and stored at  $4 \text{ }^\circ\text{C}$  before use.

**Instruments.** Transmission electron microscopy (TEM) images were obtained with Tecnai G2 F20 S-Twin (FEI, 200 kV); Scanning electron microscopy (SEM) images were recorded using a Verios G4 SEM instrument; The X-ray diffraction (XRD) pattern was defined by X' Pert Pro MPD Diffractometer

(Philips, Netherlands); Fourier transform infrared (FT-IR) spectroscopy was carried out using a 360 Fourier infrared spectrometer (IR) (Nicololi, USA); The nitrogen adsorption-desorption isotherms and Brunauer-EmmettTeller (BET) surface areas of the material were obtained on an ASAP 2020 instrument (Micromeritics, USA); Water contact angles were acquired by DSA 100 (Krüss, German);  $\zeta$  potentials of the adsorbent were measured on Zetasizer Nano ZS analyzer (Malvern, UK); The thermogravimetric analysis (TGA) experiments were performed on a TG 209 F3 Tarsus thermal gravimetric analyzer (Netzsch, Bavaria, Germany) in a nitrogen gas atmosphere at the heating rate of 10 °C min<sup>-1</sup>; The surface elemental composition of the adsorbent was tested by X-ray photoelectron spectroscopy (XPS, ESCALAB 250, Thermo); The carbon state was identified by a Renishaw Invia Raman spectrometer; An IKA RET magnetic stirrer (IKA, Guangdong, China) was used for the extraction experiment.

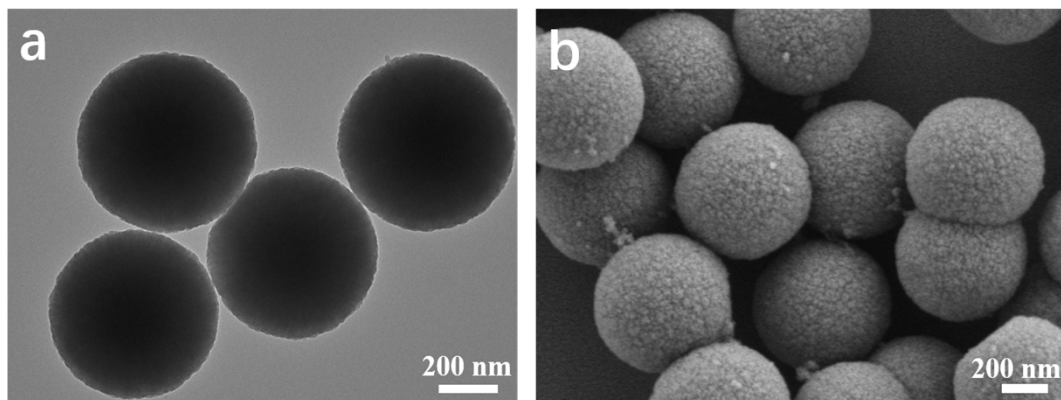

**Fig. S1** (a)TEM image of  $\text{SiO}_2@\text{SiO}_2/\text{RF}$  precursor; (b) SEM image of  $\text{SiO}_2@\text{SiO}_2/\text{RF}$  precursor.

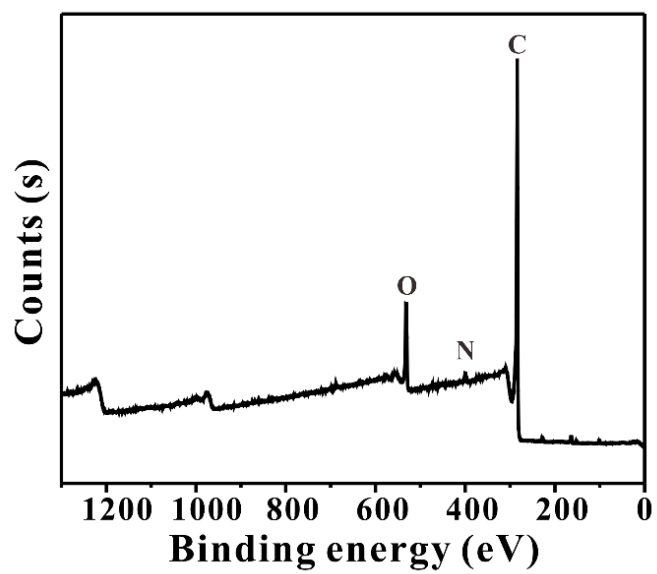

**Fig. S2** XPS pattern of MCHS-COOH.

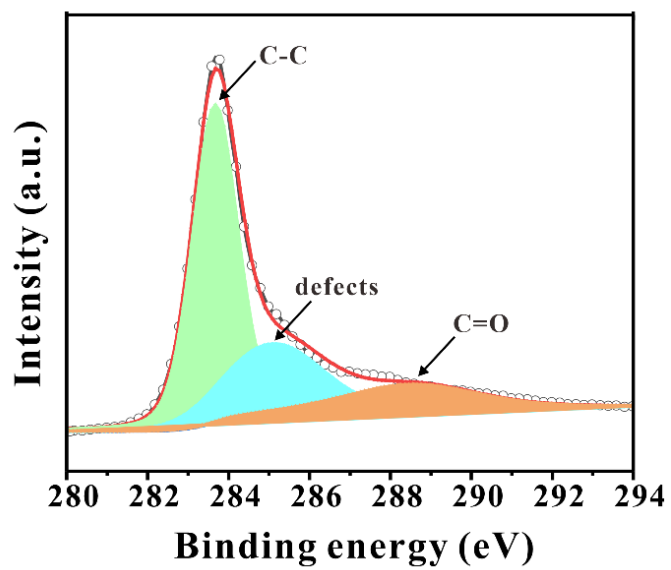

Fig. S3 XPS spectra of C 1s in MCHS-COOH.

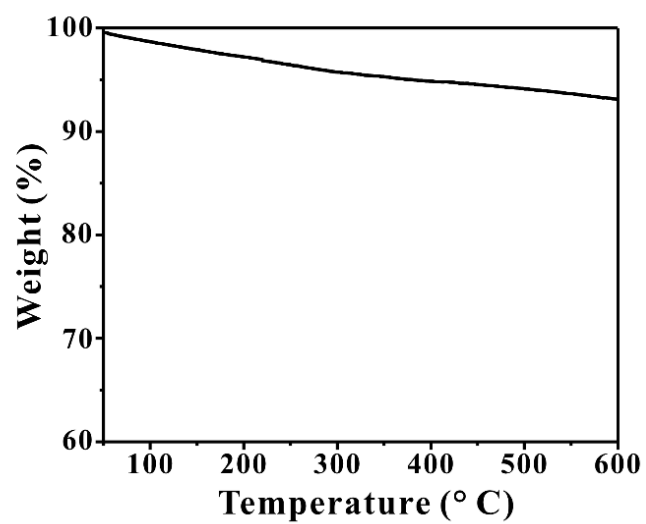

Fig. S4 TGA curve of the MCHS-COOH coating.

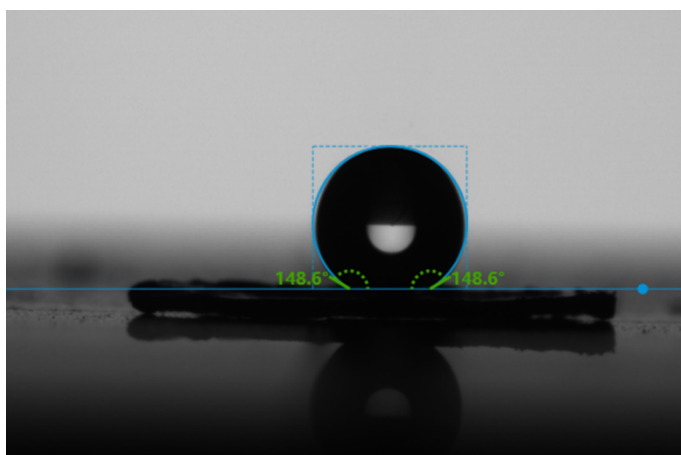

**Fig. S5** The water contact angle image of MCHS.

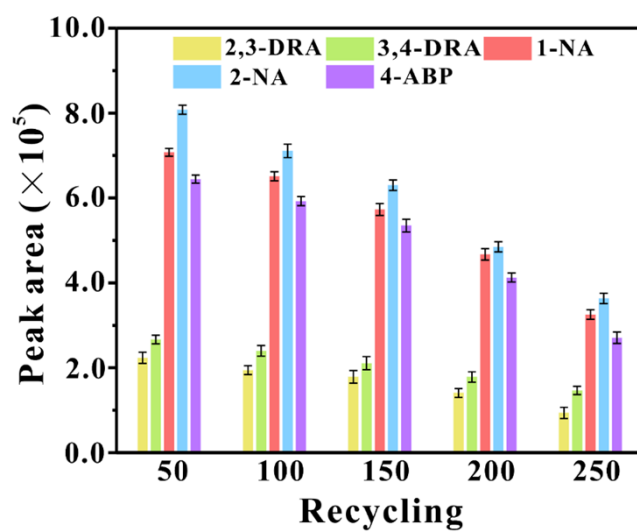

**Fig. S6** Recyclability of MCHS-COOH-coated fiber for SPME of AAs. Error bars are  $\pm$  SD ( $n = 3$ ).

**Table S1** The specific types and chemical structures of PCBs, naphthol and PAEs.

| Type of compounds | Compounds                         | Molecular formula                              | Abbreviation | Structure |
|-------------------|-----------------------------------|------------------------------------------------|--------------|-----------|
| PCBs              | 2,4,4'-trichlorobiphenyl          | C <sub>12</sub> H <sub>7</sub> Cl <sub>3</sub> | PCB(28)      |           |
|                   | 2,2',5,5'-tetrachlorobiphenyl     | C <sub>12</sub> H <sub>6</sub> Cl <sub>4</sub> | PCB(52)      |           |
|                   | 2,2',4,5,5'-pentachlorobiphenyl   | C <sub>12</sub> H <sub>5</sub> Cl <sub>5</sub> | PCB(101)     |           |
|                   | 2,2',3,4,4',5'-hexachlorobiphenyl | C <sub>12</sub> H <sub>4</sub> Cl <sub>6</sub> | PCB(153)     |           |
|                   | 2,2',4,4',5,5'-hexachlorobiphenyl | C <sub>12</sub> H <sub>4</sub> Cl <sub>6</sub> | PCB(138)     |           |
| Naphthol          | $\alpha$ -Naphthol                | C <sub>10</sub> H <sub>8</sub> O               | 1-Naphthol   |           |
|                   | $\beta$ -Naphthol                 | C <sub>10</sub> H <sub>8</sub> O               | 2-Naphthol   |           |
| PAEs              | diethyl phthalate                 | C <sub>12</sub> H <sub>14</sub> O <sub>4</sub> | DEP          |           |
|                   | diisobutyl phthalate              | C <sub>14</sub> H <sub>20</sub> O <sub>4</sub> | DIBP         |           |
|                   | dibutyl phthalate                 | C <sub>14</sub> H <sub>20</sub> O <sub>4</sub> | DBP          |           |
|                   | diisohexyl phthalate              | C <sub>20</sub> H <sub>28</sub> O <sub>4</sub> | DINOP        |           |
|                   | di-n-hexyl phthalate              | C <sub>20</sub> H <sub>28</sub> O <sub>4</sub> | DHXP         |           |

**Table S2** Chemical structures, retention time, collision energy and MS/MS transitions of AAs.

| Analytes | Molecular formula                               | Ret. time (min) | MS/MS transitions        |                       | Structure                                                                             |
|----------|-------------------------------------------------|-----------------|--------------------------|-----------------------|---------------------------------------------------------------------------------------|
|          |                                                 |                 | Transition               | Collision energy (Ev) |                                                                                       |
| 2,3-DRA  | C <sub>6</sub> H <sub>5</sub> Cl <sub>2</sub> N | 9.69            | 90.1→63.1 <sup>b</sup>   | 8 <sup>b</sup>        | 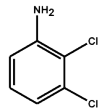   |
|          |                                                 |                 | 161.0→90.1 <sup>a</sup>  | 16 <sup>a</sup>       |                                                                                       |
|          |                                                 |                 | 163.0→90.1 <sup>b</sup>  | 16 <sup>b</sup>       |                                                                                       |
| 3,4-DRA  | C <sub>6</sub> H <sub>5</sub> Cl <sub>2</sub> N | 10.71           | 90.1→63.1 <sup>b</sup>   | 8 <sup>b</sup>        |    |
|          |                                                 |                 | 161.0→99.1 <sup>a</sup>  | 18 <sup>a</sup>       |                                                                                       |
|          |                                                 |                 | 163.0→90.1 <sup>b</sup>  | 16 <sup>b</sup>       |                                                                                       |
| 1-NA     | C <sub>10</sub> H <sub>9</sub> N                | 12.08           | 115.1→89.1 <sup>b</sup>  | 14 <sup>b</sup>       |    |
|          |                                                 |                 | 116.2→115.1 <sup>b</sup> | 8 <sup>b</sup>        |                                                                                       |
|          |                                                 |                 | 143.1→115.1 <sup>a</sup> | 20 <sup>a</sup>       |                                                                                       |
| 2-NA     | C <sub>10</sub> H <sub>9</sub> N                | 12.27           | 115.1→89.1 <sup>b</sup>  | 14 <sup>b</sup>       |  |
|          |                                                 |                 | 116.2→115.2 <sup>b</sup> | 10 <sup>b</sup>       |                                                                                       |
|          |                                                 |                 | 143.1→115.1 <sup>a</sup> | 22 <sup>a</sup>       |                                                                                       |
| 4-ABP    | C <sub>12</sub> H <sub>11</sub> N               | 14.53           | 167.2→166.1 <sup>b</sup> | 14 <sup>b</sup>       |  |
|          |                                                 |                 | 168.2→167.2 <sup>b</sup> | 10 <sup>b</sup>       |                                                                                       |
|          |                                                 |                 | 169.2→168.2 <sup>a</sup> | 10 <sup>a</sup>       |                                                                                       |

a: Quantitation transition

b: Confirmation transitio
